# Supplementary material for: Phenotype of genetically confirmed Silver-Russell syndrome beyond childhood
Source: PubMed Central journal article supplement (PMC7525777; doi:10.1136/jmedgenet-2019-106561), 2020-02-13
Supplement: jmedgenet-2019-106561supp001.pdf [file jmedgenet-2019-106561supp001.pdf]

|   | Sex    | Age   | Epigenotype              | Birth weight (g) | Birth length (cm) | Birth head circumference (cm) | Gestation (weeks) | Nasogastric tube feeding | Gastrostomy | History of diarrhoea | Growth hormone treatment | Number of offspring | Low BMI as defined by NHCS (<= -2 SD S) | Head circumference (cm) | Height (cm) | Weight (kg) | Waist circumference (cm) | Sitting height (cm) | Hip circumference (cm) | Asymmetry as defined by NHCSS | GCS or equivalent | A-levels or equivalent | Degrees or equivalent |
|---|--------|-------|--------------------------|------------------|-------------------|-------------------------------|-------------------|--------------------------|-------------|----------------------|--------------------------|---------------------|-----------------------------------------|-------------------------|-------------|-------------|--------------------------|---------------------|------------------------|-------------------------------|-------------------|------------------------|-----------------------|
| 1 | male   | 32.62 | hypomethylation ICR1/H19 | 2070             | 48.26             | .                             | 38.29             | yes                      | no          | yes                  | Yes                      | 2                   | no                                      | 56                      | 171.9       | 83.7        | 101.33                   | 94.17               | 104.13                 | yes                           | yes               | yes                    | yes                   |
| 2 | female | 37.19 | hypomethylation ICR1/H19 | 2665             | .                 | .                             | .                 | no                       | no          | yes                  | No                       | 2                   | no                                      | 56.4                    | 149.53      | 65.15       | 88.17                    | 79.5                | 108.27                 | yes                           | yes               | no                     | no                    |
| 3 | female | 16.89 | matUPD7                  | 1710             | .                 | .                             | 36.86             | yes                      | yes         | yes                  | Yes                      | 0                   | no                                      | 57.7                    | 154.37      | 58.95       | 91.8                     | 80.5                | 102.57                 | yes                           | yes               | no                     | no                    |
| 4 | female | 29.58 | hypomethylation ICR1/H19 | 2270             | .                 | .                             | 40.57             | no                       | no          | yes                  | Yes                      | 0                   | no                                      | 54.2                    | 160.87      | 54.65       | 70.33                    | 85.37               | 93.63                  | no                            | yes               | yes                    | yes                   |

|    |        |       |                          |      |      |      |       |     |    |     |     |   |     |      |        |       |       |       |        |     |     |     |     |
|----|--------|-------|--------------------------|------|------|------|-------|-----|----|-----|-----|---|-----|------|--------|-------|-------|-------|--------|-----|-----|-----|-----|
| 5  | female | 36.3  | hypomethylation ICR1/H19 | 800  | .    | .    | 42    | yes | no | yes | No  | 0 | no  | 52.4 | 130.57 | 64.53 | 89.4  | 74.9  | 114.13 | no  | yes | no  | no  |
| 6  | male   | 32.88 | hypomethylation ICR1/H19 | 1760 | 43.5 | 35.5 | 40    | yes | no | yes | Yes | 0 | no  | 56.5 | 153.23 | 65.85 | 97.13 | 77.67 | 101.9  | yes | yes | no  | no  |
| 7  | male   | 34.03 | hypomethylation ICR1/H19 | 2240 | 50   | .    | 37    | yes | no | yes | No  | 1 | no  | 55.6 | 17.25  | 62.3  | 79.23 | 90.15 | 89.77  | yes | yes | yes | yes |
| 8  | male   | 40.25 | hypomethylation ICR1/H19 | 1310 | 38   | 32   | 38    | yes | no | yes | Yes | 0 | yes | 54.1 | 146.07 | 37.1  | 66.27 | 80    | 74.83  | yes | yes | no  | yes |
| 9  | male   | 37.09 | hypomethylation ICR1/H19 | 1250 | .    | .    | 37    | yes | no | yes | Yes | 0 | no  | 55.3 | 15.03  | 44.1  | 84.33 | 81.43 | 85.6   | yes | yes | yes | yes |
| 10 | male   | 22.03 | matUPD7                  | 1644 | .    | .    | 38    | .   | no | yes | Yes | 0 | no  | 57.8 | 159.3  | 55.45 | 79.13 | 87.37 | 88.93  | no  | yes | yes | no  |
| 11 | female | 26.09 | hypomethylation ICR1/H19 | 1740 | 40.5 | .    | 37.14 | yes | no | no  | No  | 1 | no  | 55.2 | 144.7  | 44.25 | 71.3  | 78.45 | 87.57  | no  | yes | yes | no  |

|        |                |               |                                    |          |           |    |           |     |     |     |     |   |     |      |                |           |       |           |        |     |     |     |    |
|--------|----------------|---------------|------------------------------------|----------|-----------|----|-----------|-----|-----|-----|-----|---|-----|------|----------------|-----------|-------|-----------|--------|-----|-----|-----|----|
| 1<br>2 | ma<br>le       | 39<br>.1<br>4 | hypomet<br>ylation<br>ICR1/H<br>19 | 18<br>71 | 40.<br>64 | .  | 40        | no  | no  | no  | No  | 3 | no  | 57.2 | 15<br>6.8<br>5 | 75.<br>45 | 99.6  | 89.<br>4  | 107.45 | yes | no  | no  | no |
| 1<br>3 | ma<br>le       | 14<br>.4<br>7 | matUPD<br>7                        | 24<br>35 | .         | .  | 38        | no  | no  | yes | Yes | 0 | no  | 55.4 | 15<br>9.4      | 42        | 60.25 | 84.<br>45 | 76.25  | no  | no  | no  | no |
| 1<br>4 | fe<br>ma<br>le | 13<br>.7<br>5 | hypomet<br>ylation<br>ICR1/H<br>19 | 10<br>65 | .         | 28 | 33.5<br>7 | yes | no  | yes | Yes | 0 | no  | 53.4 | 15<br>3        | 45.<br>65 | 65.65 | 84.<br>75 | 88.45  | yes | no  | no  | no |
| 1<br>5 | fe<br>ma<br>le | 25<br>.1<br>1 | matUPD<br>7                        | 18<br>99 | 43        | .  | 38        | no  | no  | yes | Yes | 0 | no  | 55.9 | 14<br>7.7      | 56.<br>1  | 76.1  | 83.<br>35 | 103.85 | no  | yes | no  | no |
| 1<br>6 | ma<br>le       | 23<br>.4<br>4 | hypomet<br>ylation<br>ICR1/H<br>19 | 16<br>45 | .         | 32 | 36        | yes | yes | .   | Yes | 0 | yes | 56.1 | 16<br>3        | 41.<br>3  | 66.45 | 84.<br>95 | 76.15  | yes | yes | yes | no |
| 1<br>7 | fe<br>ma<br>le | 47<br>.8<br>6 | hypomet<br>ylation<br>ICR1/H<br>19 | 20<br>98 | .         | .  | 42        | no  | no  | yes | No  | 2 | no  | 51   | 14<br>3.4<br>5 | 57.<br>7  | 94.47 | 78.<br>65 | 98.37  | yes | yes | no  | no |
| 1<br>8 | fe<br>ma<br>le | 33<br>.9<br>3 | matUPD<br>7                        | 10<br>88 | .         | 27 | 30        | no  | no  | yes | Yes | 2 | no  | 54.2 | 13<br>9.5      | 46.<br>5  | 80.55 | 77.<br>7  | 90.3   | no  | yes | yes | no |
| 1<br>9 | fe<br>ma<br>le | 28<br>.6<br>4 | hypomet<br>ylation<br>ICR1/H<br>19 | 94<br>6  | .         | .  | 33        | no  | no  | yes | No  | 0 | yes | 52.1 | 14<br>4.0<br>5 | 35        | 60.15 | 80.<br>7  | 82.35  | no  | yes | yes | no |

|    |        |       |                          |      |    |      |       |     |     |     |     |   |     |      |        |       |       |       |        |     |     |     |     |
|----|--------|-------|--------------------------|------|----|------|-------|-----|-----|-----|-----|---|-----|------|--------|-------|-------|-------|--------|-----|-----|-----|-----|
| 20 | male   | 69.71 | hypomethylation ICR1/H19 | 1871 | .  | .    | 42    | no  | no  | yes | No  | 1 | yes | 53.8 | 153.9  | 43.6  | 78.1  | 81.6  | 79.8   | yes | no  | no  | no  |
| 21 | male   | 17.44 | matUPD7                  | 2745 | .  | .    | 38.57 | yes | no  | no  | Yes | 0 | no  | 55.1 | 164.55 | 48.65 | 69.4  | 87.95 | 83.35  | no  | yes | no  | no  |
| 22 | female | 33.01 | hypomethylation ICR1/H19 | 2200 | 47 | .    | 37    | no  | no  | yes | No  | 0 | no  | 54.7 | 157.1  | 83.75 | 105.8 | 84.85 | 118.25 | no  | yes | no  | no  |
| 23 | female | 56.85 | hypomethylation ICR1/H19 | 1760 | .  | .    | 41.43 | no  | no  | yes | Yes | 3 | no  | 53   | 140.95 | 44.35 | 79.85 | 78.25 | 88.3   | yes | yes | no  | yes |
| 24 | male   | 27.29 | hypomethylation ICR1/H19 | 2350 | .  | 34.5 | 40    | no  | no  | yes | Yes | 0 | yes | 56.1 | 171.95 | 55.5  | 79.1  | 90.55 | 84.33  | yes | yes | yes | yes |
| 25 | female | 13.83 | hypomethylation ICR1/H19 | 1870 | .  | .    | 39.86 | yes | yes | yes | Yes | 0 | yes | 51.7 | 126.9  | 22.7  | 52.23 | .     | 65.6   | yes | no  | no  | no  |
| 26 | male   | 32.35 | hypomethylation ICR1/H19 | 2041 | .  | .    | 38    | yes | no  | yes | Yes | 0 | no  | 57.7 | 168.05 | 57.8  | 76.1  | .     | 91.3   | yes | yes | yes | yes |

|    |        |       |                          |      |      |      |       |     |    |     |     |   |    |      |        |       |       |      |       |     |     |     |     |
|----|--------|-------|--------------------------|------|------|------|-------|-----|----|-----|-----|---|----|------|--------|-------|-------|------|-------|-----|-----|-----|-----|
| 27 | female | 26.9  | hypomethylation ICR1/H19 | 1730 | .    | .    | 40.57 | yes | no | yes | Yes | 0 | no | 52.7 | 140.5  | 38.9  | 70.25 | .    | 85.05 | yes | yes | yes | yes |
| 28 | male   | 31.28 | hypomethylation ICR1/H19 | 1560 | 40.6 | 35   | 39    | yes | no | yes | Yes | 0 | no | 56.3 | 136.47 | 36.65 | 76.35 | 75.2 | 75.35 | no  | yes | no  | no  |
| 29 | female | 24.4  | hypomethylation ICR1/H19 | 1304 | 38   | .    | .     | yes | no | no  | No  | 0 | no | 55.2 | 157.07 | 44.4  | 74.75 | .    | 90.35 | yes | yes | yes | yes |
| 30 | female | 13.32 | hypomethylation ICR1/H19 | 1460 | .    | .    | 35    | yes | no | yes | Yes | 0 | no | 55.5 | 153.95 | 38.5  | 64    | .    | 83.6  | yes | no  | no  | no  |
| 31 | female | 54.7  | hypomethylation ICR1/H19 | 1760 | 40.6 | 35.6 | 40.43 | yes | no | yes | Yes | 0 | no | 53.9 | 150.1  | 57.1  | 84.45 | .    | 99    | yes | yes | yes | no  |
| 32 | female | 15.4  | hypomethylation ICR1/H19 | 1458 | .    | 33   | 38.71 | yes | no | yes | Yes | 0 | no | 52.7 | 134.9  | 29.4  | 65.4  | .    | 76.55 | yes | no  | no  | no  |
| 33 | male   | 13.83 | hypomethylation ICR1/H19 | 2650 | .    | .    | 42    | no  | no | no  | Yes | 0 | no | 52.8 | 164    | 47.1  | 64.25 | .    | 83.6  | yes | no  | no  | no  |
